# Supplementary material
Source: Springer Nature journal article supplement (https://www.springermedizin.de/resource/supplementary/12935_2006_147_MOESM4_ESM.pdf/9541184)

# MEF 10 (1) Cells

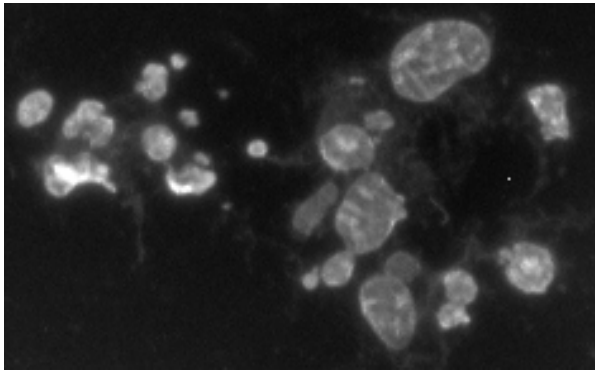

**A**

**10-32**

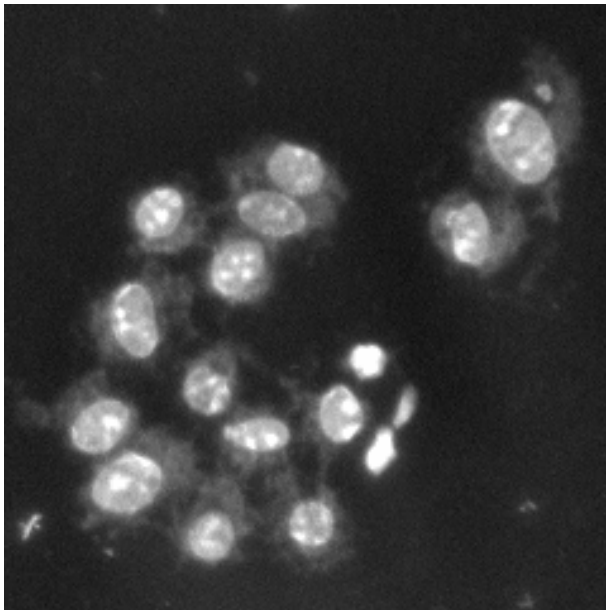

**B**

**C-0**

—  
**20 microns**  
**magnification: 10x**

Supplement: MOESM4 [file 9541184]
